# Supplementary material for: Detection of mecC-Positive Staphylococcus aureus (CC130-MRSA-XI) in Diseased European Hedgehogs (Erinaceus europaeus) in Sweden
Source: PubMed Central journal article supplement (PMC3680430; doi:10.1371/journal.pone.0066166), 2013-06-12
Supplement: pone.0066166.s001.pdf [file pone.0066166.s001.pdf]

Supplemental table S1: Full array hybridisation and PCR results of the hedgehog isolates from this study and, for comparison, of CC130-MRSA-XI isolates from [7].

| Target (Description)                              | Target (Symbol)                                                   | Method (Reference)              | DSH_M10/0061               | DSH_M10/148                 | V583/03                    | V5406/11                   |
|---------------------------------------------------|-------------------------------------------------------------------|---------------------------------|----------------------------|-----------------------------|----------------------------|----------------------------|
| <b>BACKGROUND</b>                                 | reference                                                         | [7]                             | Human<br>Ireland           | Human<br>Ireland            | This study                 | This study                 |
| <b>TYPING DATA</b>                                | spo typing                                                        | PCR & Sequencing [27]           |                            |                             | undefined                  | 1843                       |
|                                                   | MLST typing                                                       | PCR & Sequencing [26]           | ST130<br>6:57-45-2-7-58-52 | ST3764<br>6:57-45-2-7-58-52 | ST130<br>6:57-45-2-7-58-52 | ST130<br>6:57-45-2-7-58-52 |
| <b>SPECIES MARKER</b>                             | Domain 1 of 23S rRNA                                              | <i>rrnD1 (S. aureus)</i>        | Array [22]                 | POS                         | POS                        | POS                        |
|                                                   | glycerol 3-phosphate dehydrogenase, locus 1                       | <i>gapA</i>                     | Array [22]                 | POS                         | POS                        | POS                        |
|                                                   | Jahalase A                                                        | <i>hdaA</i>                     | Array [22]                 | POS                         | POS                        | POS                        |
|                                                   | coagulase                                                         | <i>coaA</i>                     | Array [22]                 | POS                         | POS                        | POS                        |
|                                                   | thermostable extracellular nuclease                               | <i>nuc1</i>                     | Array [22]                 | POS                         | POS                        | POS                        |
|                                                   | staphylococcal protein A                                          | <i>spa</i>                      | Array [22]                 | POS                         | POS                        | POS                        |
|                                                   | Ugc-binding protein                                               | <i>uicB</i>                     | Array [22]                 | POS                         | POS                        | POS                        |
| <b>REGULATORY GENES</b>                           | staphylococcal accessory regulator A                              | <i>sarA</i>                     | Array [22]                 | POS                         | POS                        | POS                        |
|                                                   | histidine protein kinase, <i>sae</i> locus                        | <i>saeS</i>                     | Array [22]                 | POS                         | POS                        | POS                        |
|                                                   | sensor protein                                                    | <i>saeS</i>                     | Array [22]                 | POS                         | POS                        | POS                        |
|                                                   | accessory gene regulator allele I                                 | <i>sarr1 (total)</i>            | Array [22]                 | NEG                         | NEG                        | NEG                        |
|                                                   | accessory gene regulator allele II                                | <i>sarr1 (total)</i>            | Array [22]                 | NEG                         | NEG                        | NEG                        |
|                                                   | accessory gene regulator allele III                               | <i>sarr1 (total)</i>            | Array [22]                 | POS                         | POS                        | POS                        |
|                                                   | accessory gene regulator allele IV                                | <i>sarr1 (total)</i>            | Array [22]                 | NEG                         | NEG                        | NEG                        |
|                                                   | haemolysin <i>hlyA</i>                                            | <i>hlyA</i>                     | Array [22]                 | POS                         | POS                        | POS                        |
| <b>METHICILLIN RESISTANCE AND SCCmec TYPING</b>   | alternate penicillin binding protein 2, defining MRSA             | <i>mecA</i>                     | Array [22], Array [2]      | NEG                         | NEG                        | NEG                        |
|                                                   | mec alternate penicillin binding protein 2 from SCCmec XI         | <i>mecC</i>                     | Array [22], see Table 1,   | POS                         | POS                        | POS                        |
|                                                   | truncated signal transducer protein MecR1                         | <i>delta_mecR</i>               | Array [2], PCR, Sequencing | NEG                         | NEG                        | NEG                        |
|                                                   | glycerophosphoryl diester phosphodiesterase, associated with mecA | <i>ugdP</i>                     | Array [22]                 | NEG                         | NEG                        | NEG                        |
|                                                   | cassette chromosome recombinase genes A/B1                        | <i>ccrA-1</i>                   | Array [22]                 | NEG                         | NEG                        | NEG                        |
|                                                   | cassette chromosome recombinase genes A/B2                        | <i>ccrB-1</i>                   | Array [22]                 | NEG                         | NEG                        | NEG                        |
|                                                   | cassette chromosome recombinase gene A1 from SCCmec               | <i>ccrA-1 (SCCmec XI)</i>       | PCR [7]                    | POS                         | POS                        | POS                        |
|                                                   | plasmid sensitive surface protein                                 | <i>plhSCC (COL)</i>             | Array [22]                 | NEG                         | NEG                        | NEG                        |
|                                                   | hypothetical protein from SCCmec elements                         | <i>GSK968-dis</i>               | Array [22]                 | NEG                         | NEG                        | NEG                        |
|                                                   | cassette chromosome recombinase genes A/B3                        | <i>ccrA-2</i>                   | Array [22]                 | NEG                         | NEG                        | NEG                        |
|                                                   | potassium-translocating ATPase A, chain 2                         | <i>ccrB-2</i>                   | Array [22]                 | NEG                         | NEG                        | NEG                        |
|                                                   | potassium-translocating ATPase A, chain 1                         | <i>hdpA-SCC</i>                 | Array [22]                 | NEG                         | NEG                        | NEG                        |
|                                                   | potassium-translocating ATPase C, chain 2                         | <i>hdpB-SCC</i>                 | Array [22]                 | NEG                         | NEG                        | NEG                        |
|                                                   | sensor kinase protein                                             | <i>hdpD-SCC</i>                 | Array [22]                 | NEG                         | NEG                        | NEG                        |
|                                                   | KDP operon transcriptional regulatory protein                     | <i>hdpE-SCC</i>                 | Array [22]                 | NEG                         | NEG                        | NEG                        |
|                                                   | Phenol soluble modulins associated with SCCmec elements           | <i>PSM-mec</i>                  | PCR [24]                   | NEG                         | NEG                        | NEG                        |
|                                                   | methicillin resistance regulatory protein                         | <i>mecI</i>                     | Array [22]                 | NEG                         | NEG                        | NEG                        |
|                                                   | signal transducer protein MecR1                                   | <i>mecR</i>                     | Array [22]                 | NEG                         | NEG                        | NEG                        |
|                                                   | homolog of xylose repressor, associated with SCCmec elements      | <i>xyfR</i>                     | Array [22]                 | NEG                         | NEG                        | NEG                        |
|                                                   | cassette chromosome recombinase genes A/B3                        | <i>ccrA-3</i>                   | Array [22]                 | NEG                         | NEG                        | NEG                        |
|                                                   | cassette chromosome recombinase genes A/B4                        | <i>ccrB-3</i>                   | Array [22]                 | NEG                         | NEG                        | NEG                        |
|                                                   | cassette chromosome recombinase gene B3 from SCCmec XI            | <i>ccrB-3 (SCCmec XI)</i>       | PCR [7]                    | POS                         | POS                        | POS                        |
|                                                   | mercury resistance operon                                         | <i>merA</i>                     | Array [22]                 | NEG                         | NEG                        | NEG                        |
|                                                   | arsenic resistance operon                                         | <i>merB</i>                     | Array [22]                 | NEG                         | NEG                        | NEG                        |
|                                                   | cassette chromosome recombinase genes "ccrAA" (hypothetical)      | <i>ccrAA</i>                    | Array [22]                 | NEG                         | NEG                        | NEG                        |
|                                                   | <i>and ccc</i>                                                    | <i>ccc (BS-2082)</i>            | Array [22]                 | NEG                         | NEG                        | NEG                        |
|                                                   | cassette chromosome recombinase genes A/B4                        | <i>ccrA-4</i>                   | Array [22]                 | NEG                         | NEG                        | NEG                        |
|                                                   |                                                                   | <i>ccrB-4</i>                   | Array [22]                 | NEG                         | NEG                        | NEG                        |
| <b>RESISTANCE : PENICILLINASE</b>                 | beta lactamase                                                    | <i>blaZ</i>                     | Array [22]                 | NEG                         | NEG                        | NEG                        |
|                                                   | beta lactamase repressor (inhibitor)                              | <i>blai</i>                     | Array [22]                 | NEG                         | NEG                        | NEG                        |
|                                                   | beta lactamase regulatory protein                                 | <i>blar</i>                     | Array [22]                 | NEG                         | NEG                        | NEG                        |
|                                                   | beta lactamase from SCCmec XI                                     | <i>blaZ-SCCmec XI</i>           | Array [22], see Table 1    | POS                         | POS                        | POS                        |
| <b>RESISTANCE : MLS-ANTIBIOTICS</b>               | rRNA methyltransferase, erythromycin/clindamycin resistance       | <i>erm(A)</i>                   | Array [22]                 | NEG                         | NEG                        | NEG                        |
|                                                   | erythromycin/clindamycin resistance                               | <i>erm(B)</i>                   | Array [22]                 | NEG                         | NEG                        | NEG                        |
|                                                   | lincomamid-nucleotidyltransferase                                 | <i>lnu(A)</i>                   | Array [22]                 | NEG                         | NEG                        | NEG                        |
|                                                   | energy dependent efflux of erythromycin                           | <i>msr(A)</i>                   | Array [22]                 | NEG                         | NEG                        | NEG                        |
|                                                   | macrolide efflux protein A                                        | <i>meff(A)</i>                  | Array [22]                 | NEG                         | NEG                        | NEG                        |
|                                                   | probable hydroxybutyryl-glycerol synthetase                       | <i>hbc(C)</i>                   | Array [22]                 | NEG                         | NEG                        | NEG                        |
|                                                   | virginiamycin A acetyltransferase                                 | <i>voit(A)</i>                  | Array [22]                 | NEG                         | NEG                        | NEG                        |
|                                                   | acetyltransferase inactivating streptogramin A                    | <i>voit(B)</i>                  | Array [22]                 | NEG                         | NEG                        | NEG                        |
|                                                   | ATP binding protein, streptogramin A resistance                   | <i>voit(B)</i>                  | Array [22]                 | NEG                         | NEG                        | NEG                        |
|                                                   | virginiamycin B hydrolase                                         | <i>vgb(A)</i>                   | Array [22]                 | NEG                         | NEG                        | NEG                        |
| <b>RESISTANCE : AMINOGLYOSIDES</b>                | bifunctional enzyme <i>Aac/Aph</i> , gentamicin resistance        | <i>aacA-aphD</i>                | Array [22]                 | NEG                         | NEG                        | NEG                        |
|                                                   | aminoglycoside adenyltransferase, tobramycin resistance           | <i>aadI</i>                     | Array [22]                 | NEG                         | NEG                        | NEG                        |
|                                                   | 3'S-aminoglycoside phosphotransferase, neo/kanamycin resistance   | <i>aphA3</i>                    | Array [22]                 | NEG                         | NEG                        | NEG                        |
| <b>RESISTANCE : MISCELLANEOUS GENES</b>           | streptothricin acetyltransferase                                  | <i>sat</i>                      | Array [22]                 | NEG                         | NEG                        | NEG                        |
|                                                   | dihydrofolate reductase type 1                                    | <i>dhfr1</i>                    | Array [22]                 | NEG                         | NEG                        | NEG                        |
|                                                   | fusidic acid resistance                                           | <i>fusA</i>                     | Array [22]                 | NEG                         | NEG                        | NEG                        |
|                                                   | hypothetical protein associated with fusidic acid resistance      | <i>fusC (O6G050)</i>            | Array [22]                 | NEG                         | NEG                        | NEG                        |
|                                                   | mupirocin resistance protein                                      | <i>mupA</i>                     | Array [22]                 | NEG                         | NEG                        | NEG                        |
|                                                   | tetracycline resistance                                           | <i>tet(K)</i>                   | Array [22]                 | NEG                         | NEG                        | NEG                        |
|                                                   | chloramphenicol acetyltransferase                                 | <i>cat (total)</i>              | Array [22]                 | NEG                         | NEG                        | NEG                        |
|                                                   |                                                                   | <i>cat (spC21)</i>              | Array [22]                 | NEG                         | NEG                        | NEG                        |
|                                                   |                                                                   | <i>cat (spC22)</i>              | Array [22]                 | NEG                         | NEG                        | NEG                        |
|                                                   |                                                                   | <i>cat (pAMC24/pC194)</i>       | Array [22]                 | NEG                         | NEG                        | NEG                        |
|                                                   |                                                                   | <i>cat (pSBK203R)</i>           | Array [22]                 | NEG                         | NEG                        | NEG                        |
|                                                   | 7S5 rRNA methyltransferase                                        | <i>trf</i>                      | Array [22]                 | NEG                         | NEG                        | NEG                        |
|                                                   | chloramphenicol/tetracycline exporter                             | <i>tetA</i>                     | Array [22]                 | NEG                         | NEG                        | NEG                        |
|                                                   | metallothionein transferase                                       | <i>mtxB</i>                     | Array [22]                 | NEG                         | NEG                        | NEG                        |
| <b>RESISTANCE : EFFLUX SYSTEMS</b>                | quaternary ammonium compound resistance protein A                 | <i>qacA</i>                     | Array [22]                 | NEG                         | NEG                        | NEG                        |
|                                                   | quaternary ammonium compound resistance protein C                 | <i>qacC (total)</i>             | Array [22]                 | NEG                         | NEG                        | NEG                        |
|                                                   |                                                                   | <i>qacC (consensus)</i>         | Array [22]                 | NEG                         | NEG                        | NEG                        |
|                                                   |                                                                   | <i>qacC (equine)</i>            | Array [22]                 | NEG                         | NEG                        | NEG                        |
|                                                   |                                                                   | <i>qacC (S45)</i>               | Array [22]                 | NEG                         | NEG                        | NEG                        |
|                                                   |                                                                   | <i>qacC (Stax)</i>              | Array [22]                 | NEG                         | NEG                        | NEG                        |
|                                                   |                                                                   | <i>qacC (ST94)</i>              | Array [22]                 | NEG                         | NEG                        | NEG                        |
|                                                   | transport/efflux protein                                          | <i>sdhM</i>                     | Array [22]                 | POS                         | POS                        | POS                        |
| <b>RESISTANCE : GLYCOPETIDES</b>                  | vancomycin resistance gene                                        | <i>vanA</i>                     | Array [22]                 | NEG                         | NEG                        | NEG                        |
|                                                   | vancomycin resistance gene from enterococci and Clostridium       | <i>vanB</i>                     | Array [22]                 | NEG                         | NEG                        | NEG                        |
|                                                   | Tecoplanin resistance gene from enterococci                       | <i>vanZ</i>                     | Array [22]                 | NEG                         | NEG                        | NEG                        |
| <b>VIROLENCE : TOX.SCHOCK.TOXIN</b>               | toxic shock syndrome toxin 1                                      | <i>tst1 (consensus)</i>         | Array [22]                 | NEG                         | NEG                        | NEG                        |
|                                                   |                                                                   | <i>tst1 ("human" allele)</i>    | Array [22]                 | NEG                         | NEG                        | NEG                        |
|                                                   |                                                                   | <i>tst1 ("bovine" allele)</i>   | Array [22]                 | NEG                         | NEG                        | NEG                        |
| <b>VIROLENCE : ENTEROTOXINS</b>                   | enterotoxin A                                                     | <i>sea</i>                      | Array [22]                 | NEG                         | NEG                        | NEG                        |
|                                                   | enterotoxin A, allele from strain 320E                            | <i>sea (320E)</i>               | Array [22]                 | NEG                         | NEG                        | NEG                        |
|                                                   | enterotoxin A, allele from strain N315 - enterotoxin P            | <i>sea (N315) / sep</i>         | Array [22]                 | NEG                         | NEG                        | NEG                        |
|                                                   | enterotoxin B                                                     | <i>seb</i>                      | Array [22]                 | NEG                         | NEG                        | NEG                        |
|                                                   | enterotoxin C                                                     | <i>sec</i>                      | Array [22]                 | NEG                         | NEG                        | NEG                        |
|                                                   | enterotoxin D                                                     | <i>sed</i>                      | Array [22]                 | NEG                         | NEG                        | NEG                        |
|                                                   | enterotoxin E                                                     | <i>see</i>                      | Array [22]                 | NEG                         | NEG                        | NEG                        |
|                                                   | enterotoxin G                                                     | <i>seg</i>                      | Array [22]                 | NEG                         | NEG                        | NEG                        |
|                                                   | enterotoxin H                                                     | <i>seh</i>                      | Array [22]                 | NEG                         | NEG                        | NEG                        |
|                                                   | enterotoxin I                                                     | <i>sei</i>                      | Array [22]                 | NEG                         | NEG                        | NEG                        |
|                                                   | enterotoxin J                                                     | <i>sej</i>                      | Array [22]                 | NEG                         | NEG                        | NEG                        |
|                                                   | enterotoxin K                                                     | <i>sek</i>                      | Array [22]                 | NEG                         | NEG                        | NEG                        |
|                                                   | enterotoxin L                                                     | <i>sel</i>                      | Array [22]                 | NEG                         | NEG                        | NEG                        |
|                                                   | enterotoxin M                                                     | <i>selm</i>                     | Array [22]                 | NEG                         | NEG                        | NEG                        |
|                                                   | enterotoxin N                                                     | <i>seln (consensus)</i>         | Array [22]                 | NEG                         | NEG                        | NEG                        |
|                                                   |                                                                   | <i>seln (other than RF122)</i>  | Array [22]                 | NEG                         | NEG                        | NEG                        |
|                                                   | enterotoxin O                                                     | <i>selo</i>                     | Array [22]                 | NEG                         | NEG                        | NEG                        |
|                                                   | enterotoxin Q                                                     | <i>selq</i>                     | Array [22]                 | NEG                         | NEG                        | NEG                        |
|                                                   | enterotoxin R                                                     | <i>selr</i>                     | Array [22]                 | NEG                         | NEG                        | NEG                        |
|                                                   | Enterotoxin U and/or V                                            | <i>selu/y</i>                   | Array [22]                 | NEG                         | NEG                        | NEG                        |
|                                                   | enterotoxin-like protein ORF CM14                                 | <i>ORF CM14</i>                 | Array [22]                 | NEG                         | NEG                        | NEG                        |
| <b>VIROLENCE : HLG AND LEUKOCIDINS</b>            | haemolysin gamma / leukocidin, component B                        | <i>hlyB</i>                     | Array [22]                 | POS                         | POS                        | POS                        |
|                                                   | haemolysin gamma / leukocidin, component C                        | <i>hlyC</i>                     | Array [22]                 | POS                         | POS                        | POS                        |
|                                                   | haemolysin gamma, component A                                     | <i>hlyA</i>                     | Array [22]                 | POS                         | POS                        | POS                        |
|                                                   | Panton Valentine leukocidin F component                           | <i>lukF-PV</i>                  | Array [22]                 | NEG                         | NEG                        | NEG                        |
|                                                   | Panton Valentine leukocidin S component                           | <i>lukS-PV</i>                  | Array [22]                 | NEG                         | NEG                        | NEG                        |
|                                                   | F component from hypothetical leukocidin from ruminants           | <i>lukF-PV (PB3)</i>            | Array [22]                 | NEG                         | NEG                        | NEG                        |
|                                                   | S component from hypothetical leukocidin from ruminants           | <i>lukM</i>                     | Array [22]                 | NEG                         | NEG                        | NEG                        |
|                                                   | leukocidin D component                                            | <i>lukD</i>                     | Array [22]                 | POS                         | POS                        | POS                        |
|                                                   | leukocidin E component                                            | <i>lukE</i>                     | Array [22]                 | NEG                         | NEG                        | NEG                        |
|                                                   | leukocidin/haemolysin toxin family protein                        | <i>lukK</i>                     | Array [22]                 | POS                         | POS                        | POS                        |
|                                                   | leukocidin/haemolysin toxin family protein                        | <i>lukY</i>                     | Array [22]                 | POS                         | POS                        | POS                        |
|                                                   |                                                                   | <i>lukY (ST70-5745)</i>         | Array [22]                 | NEG                         | NEG                        | NEG                        |
| <b>VIROLENCE : HAEMOLYSINS</b>                    | putative membrane protein                                         | <i>hly</i>                      | Array [22]                 | POS                         | POS                        | POS                        |
|                                                   | haemolysin alpha                                                  | <i>hlyA</i>                     | Array [22]                 | POS                         | POS                        | POS                        |
|                                                   | putative membrane protein                                         | <i>hlyII (consensus)</i>        | Array [22]                 | POS                         | POS                        | POS                        |
|                                                   |                                                                   | <i>hlyII (other than RF122)</i> | Array [22]                 | NEG                         | NEG                        | NEG                        |
|                                                   | haemolysin beta                                                   | <i>hlyB (probe 1)</i>           | Array [22]                 | POS                         | POS                        | POS                        |
|                                                   |                                                                   | <i>hlyB (probe 2)</i>           | Array [22]                 | POS                         | POS                        | POS                        |
|                                                   |                                                                   | <i>hlyB (probe 3)</i>           | Array [22]                 | POS                         | POS                        | POS                        |
|                                                   |                                                                   | <i>un-identified hly</i>        | Array [22]                 | POS                         | POS                        | POS                        |
| <b>VIROLENCE : HLB-CONV PHAGES</b>                | staphylokinase                                                    | <i>stx</i>                      | Array [22]                 | NEG                         | NEG                        | NEG                        |
|                                                   | chemotaxis-inhibiting protein (CHIPS)                             | <i>chp</i>                      | Array [22]                 | NEG                         | NEG                        | NEG                        |
|                                                   | staphylococcal complement inhibitor                               | <i>sci</i>                      | Array [22]                 | NEG                         | NEG                        | NEG                        |
| <b>VIROLENCE : EXFOLYTOXINS</b>                   | exfoliative toxin serotype A                                      | <i>etA</i>                      | Array [22]                 | NEG                         | NEG                        | NEG                        |
|                                                   | exfoliative toxin serotype B                                      | <i>etB</i>                      | Array [22]                 | NEG                         | NEG                        | NEG                        |
|                                                   | exfoliative toxin D                                               | <i>etD</i>                      | Array [22]                 | NEG                         | NEG                        | NEG                        |
|                                                   | putative exfoliative toxin homologue                              | <i>etD2</i>                     | Array [22]                 | NEG                         | NEG                        | NEG                        |
| <b>VIROLENCE : EPIDERMAL CELL DIFF. INHIBITOR</b> | epidermal cell differentiation inhibitor                          | <i>edfA</i>                     | Array [22]                 | NEG                         | NEG                        | NEG                        |
|                                                   | epidermal cell differentiation inhibitor B                        | <i>edfB</i>                     | Array [22]                 | POS                         | POS                        | POS                        |
|                                                   | epidermal cell differentiation inhibitor C                        | <i>edfC</i>                     | Array [22]                 | NEG                         | NEG                        | NEG                        |
| <b>VIROLENCE : ACME LOCUS</b>                     | ACME locus                                                        | <i>acmE (total)</i>             | Array [22]                 | NEG                         | NEG                        | NEG                        |
|                                                   | ACME locus: arginine dihydrolase                                  | <i>arcA-SCC</i>                 | Array [22]                 | NEG                         | NEG                        | NEG                        |
|                                                   | ACME locus: ornithine carbamoyltransferase                        | <i>arcB-SCC</i>                 | Array [22]                 | NEG                         | NEG                        | NEG                        |
|                                                   | ACME locus: carboxymethylase                                      | <i>arcC-SCC</i>                 | Array [22]                 | NEG                         | NEG                        | NEG                        |
|                                                   | ACME locus: arginine/ornithine transporter                        | <i>arcD-SCC</i>                 | Array [22]                 | NEG                         | NEG                        | NEG                        |

| Target (Description)                                                                            | Target (Symbol)                                                                                                      | Method (Reference)                                           | DSH_M10/0061                         | DSH_M10/148 | V588/03 | V5406/11 |     |
|-------------------------------------------------------------------------------------------------|----------------------------------------------------------------------------------------------------------------------|--------------------------------------------------------------|--------------------------------------|-------------|---------|----------|-----|
| VIRULENCE : PROTEASES                                                                           | aur (consensus)                                                                                                      | Array (22)                                                   | POS                                  | POS         | POS     | POS      |     |
|                                                                                                 | aur (other than MRSA252)                                                                                             | Array (22)                                                   | POS                                  | NEG         | POS     | POS      |     |
|                                                                                                 | aur (MRSA252)                                                                                                        | Array (22)                                                   | POS                                  | POS         | NEG     | NEG      |     |
|                                                                                                 | serin protease A                                                                                                     | spIA                                                         | Array (22)                           | POS         | NEG     | POS      |     |
|                                                                                                 | serin protease B                                                                                                     | spIB                                                         | Array (22)                           | POS         | NEG     | POS      |     |
|                                                                                                 | serin protease E                                                                                                     | spIE                                                         | Array (22)                           | POS         | NEG     | POS      |     |
|                                                                                                 | glutamylendopeptidase                                                                                                | spIA                                                         | Array (22)                           | POS         | POS     | POS      |     |
|                                                                                                 | staphopain B, protease                                                                                               | spII                                                         | Array (22)                           | POS         | POS     | POS      |     |
|                                                                                                 | staphopain A (staphylopan A), protease                                                                               | spII (consensus)                                             | Array (22)                           | POS         | POS     | POS      |     |
|                                                                                                 | spII (other than ST93)                                                                                               | Array (22)                                                   | POS                                  | POS         | POS     | POS      |     |
| VIRULENCE : STAPHYLOCOCCAL SUPERANTIGEN / ENTEROTOXIN-LIKE GENES (SET/SEA)                      | staphyl_ exotoxinlike protein                                                                                        | setC (=setD)                                                 | Array (22)                           | POS         | POS     | POS      |     |
|                                                                                                 | staphylococcal superantigenic protein 1                                                                              | ss01/set1 (COL)                                              | Array (22)                           | POS         | NEG     | NEG      |     |
|                                                                                                 |                                                                                                                      | ss01/set1 (MRSA252)                                          | Array (22)                           | POS         | NEG     | NEG      |     |
|                                                                                                 |                                                                                                                      | ss01/set6 (MW2+MSSA476)                                      | Array (22)                           | NEG         | NEG     | NEG      |     |
|                                                                                                 |                                                                                                                      | ss01/set6 (MRSA252)                                          | Array (22)                           | NEG         | NEG     | NEG      |     |
|                                                                                                 |                                                                                                                      | ss01/set6 (RF122)                                            | Array (22)                           | NEG         | NEG     | NEG      |     |
|                                                                                                 |                                                                                                                      | ss01/set6 (other alleles)                                    | Array (22)                           | NEG         | NEG     | NEG      |     |
|                                                                                                 | staphylococcal superantigenic protein 2                                                                              | ss02/set7                                                    | Array (22)                           | POS         | POS     | POS      |     |
|                                                                                                 |                                                                                                                      | ss02/set7 (MRSA252)                                          | Array (22)                           | POS         | NEG     | NEG      |     |
|                                                                                                 | staphylococcal superantigenic protein 3                                                                              | ss03/set8_probe 1                                            | Array (22)                           | POS         | POS     | POS      |     |
|                                                                                                 | ss03/set8_probe 2                                                                                                    | Array (22)                                                   | POS                                  | POS         | POS     |          |     |
|                                                                                                 | ss03/set8 (MRSA252_SAR0424)                                                                                          | Array (22)                                                   | POS                                  | NEG         | NEG     |          |     |
| staphylococcal superantigenic protein 4                                                         | ss04/set9                                                                                                            | Array (22)                                                   | POS                                  | POS         | POS     |          |     |
|                                                                                                 | ss04/set9 (MRSA252_SAR0425)                                                                                          | Array (22)                                                   | POS                                  | AMB         | NEG     |          |     |
| staphylococcal superantigenic protein 5                                                         | ss05/set3_probe 1                                                                                                    | Array (22)                                                   | POS                                  | NEG         | NEG     |          |     |
|                                                                                                 | ss05/set3 (RF122_probe-611)                                                                                          | Array (22)                                                   | POS                                  | POS         | POS     |          |     |
|                                                                                                 | ss05/set3_probe 2 (612)                                                                                              | Array (22)                                                   | POS                                  | AMB         | POS     |          |     |
|                                                                                                 | ss05/set3 (MRSA252)                                                                                                  | Array (22)                                                   | POS                                  | NEG         | NEG     |          |     |
| staphylococcal superantigenic protein 6                                                         | ss06/set1                                                                                                            | Array (22)                                                   | POS                                  | NEG         | NEG     |          |     |
|                                                                                                 | ss06 (NCTC8325+MW2)                                                                                                  | Array (22)                                                   | POS                                  | NEG         | NEG     |          |     |
| staphylococcal superantigenic protein 7                                                         | ss07/set7                                                                                                            | Array (22)                                                   | POS                                  | POS         | POS     |          |     |
|                                                                                                 | ss07/set7 (MRSA252)                                                                                                  | Array (22)                                                   | POS                                  | AMB         | AMB     |          |     |
|                                                                                                 | ss07/set1 (AF188836)                                                                                                 | Array (22)                                                   | POS                                  | AMB         | AMB     |          |     |
| staphylococcal superantigenic protein 8                                                         | ss08/set12_probe 1                                                                                                   | Array (22)                                                   | POS                                  | POS         | POS     |          |     |
|                                                                                                 | ss08/set12_probe 2                                                                                                   | Array (22)                                                   | POS                                  | POS         | POS     |          |     |
| staphylococcal superantigenic protein 9                                                         | ss09/set5_probe 1                                                                                                    | Array (22)                                                   | POS                                  | POS         | POS     |          |     |
|                                                                                                 | ss09/set5_probe 2                                                                                                    | Array (22)                                                   | POS                                  | POS         | POS     |          |     |
|                                                                                                 | ss09/set5 (MRSA252)                                                                                                  | Array (22)                                                   | POS                                  | NEG         | NEG     |          |     |
| staphylococcal superantigenic protein 10                                                        | ss10/set4                                                                                                            | Array (22)                                                   | POS                                  | POS         | POS     |          |     |
|                                                                                                 | ss10 (RF122)                                                                                                         | Array (22)                                                   | POS                                  | AMB         | AMB     |          |     |
|                                                                                                 | ss10/set4 (MRSA252)                                                                                                  | Array (22)                                                   | POS                                  | AMB         | NEG     |          |     |
| staphylococcal superantigenic protein 11                                                        | ss11/set2 (COL)                                                                                                      | Array (22)                                                   | POS                                  | NEG         | NEG     |          |     |
|                                                                                                 | ss11+set2(Mu50+H315)                                                                                                 | Array (22)                                                   | POS                                  | NEG         | NEG     |          |     |
|                                                                                                 | ss11+set2(MW2+MSSA476)                                                                                               | Array (22)                                                   | POS                                  | NEG         | NEG     |          |     |
|                                                                                                 | ss11/set2 (MRSA252)                                                                                                  | Array (22)                                                   | POS                                  | NEG         | NEG     |          |     |
| staphylococcal exotoxinlike protein, second locus                                               | setB                                                                                                                 | Array (22)                                                   | POS                                  | POS         | POS     |          |     |
|                                                                                                 | setB2 (MRSA252)                                                                                                      | Array (22)                                                   | POS                                  | NEG         | NEG     |          |     |
|                                                                                                 | setB2                                                                                                                | Array (22)                                                   | POS                                  | POS         | POS     |          |     |
|                                                                                                 | setB2 (MRSA252)                                                                                                      | Array (22)                                                   | POS                                  | NEG         | NEG     |          |     |
| CAPSULE AND BIOFILM-ASSOCIATED GENES                                                            | capsule type 1                                                                                                       | cap 1 (total)                                                | Array (22)                           | NEG         | NEG     | NEG      |     |
|                                                                                                 | capsule type 5                                                                                                       | cap 5 (total)                                                | Array (22)                           | NEG         | NEG     | NEG      |     |
|                                                                                                 | capsule type 8                                                                                                       | cap 8 (total)                                                | Array (22)                           | POS         | POS     | POS      |     |
|                                                                                                 | intercellular adhesion protein A                                                                                     | icaA                                                         | Array (22)                           | POS         | POS     | POS      |     |
|                                                                                                 | intercellular adhesion protein C                                                                                     | icaC                                                         | Array (22)                           | POS         | POS     | POS      |     |
|                                                                                                 | biofilm PII synthesis protein D                                                                                      | icaD                                                         | Array (22)                           | POS         | POS     | POS      |     |
|                                                                                                 | surface protein involved in biofilm formation                                                                        | isp                                                          | Array (22)                           | NEG         | NEG     | NEG      |     |
|                                                                                                 | ADHESION FACTORS / GENES ENCODING MICROBIAL SURFACE COMPONENTS RECOGNIZING ADHESIVE MATRIX MOLECULES (MSCRAMM GENES) | bone sialoproteinbinding protein                             | bbp (total)                          | Array (22)  | POS     | POS      | POS |
|                                                                                                 |                                                                                                                      |                                                              | bbp (consensus)                      | Array (22)  | POS     | NEG      | NEG |
|                                                                                                 |                                                                                                                      |                                                              | bbp (COL+MW2)                        | Array (22)  | NEG     | NEG      | NEG |
|                                                                                                 |                                                                                                                      | bbp (MRSA252)                                                | Array (22)                           | NEG         | NEG     | NEG      |     |
|                                                                                                 |                                                                                                                      | bbp (Mu50)                                                   | Array (22)                           | AMB         | POS     | POS      |     |
|                                                                                                 |                                                                                                                      | bbp (RF122)                                                  | Array (22)                           | NEG         | NEG     | NEG      |     |
|                                                                                                 |                                                                                                                      | bbp (ST45)                                                   | Array (22)                           | NEG         | NEG     | NEG      |     |
| clumping factor A                                                                               |                                                                                                                      | cfa (total)                                                  | Array (22)                           | POS         | POS     | POS      |     |
|                                                                                                 |                                                                                                                      | cfa (consensus)                                              | Array (22)                           | POS         | POS     | POS      |     |
|                                                                                                 |                                                                                                                      | cfa (COL+RF122)                                              | Array (22)                           | POS         | AMB     | AMB      |     |
|                                                                                                 | cfa (MRSA252)                                                                                                        | Array (22)                                                   | POS                                  | AMB         | AMB     |          |     |
|                                                                                                 | cfa (Mu50+MW2)                                                                                                       | Array (22)                                                   | POS                                  | AMB         | AMB     |          |     |
| clumping factor B                                                                               | cfb (total)                                                                                                          | Array (22)                                                   | POS                                  | POS         | POS     |          |     |
|                                                                                                 | cfb (consensus)                                                                                                      | Array (22)                                                   | POS                                  | POS         | POS     |          |     |
|                                                                                                 | cfb (COL+Mu50)                                                                                                       | Array (22)                                                   | POS                                  | NEG         | NEG     |          |     |
|                                                                                                 | cfb (MW2)                                                                                                            | Array (22)                                                   | POS                                  | AMB         | AMB     |          |     |
|                                                                                                 | cfb (RF122)                                                                                                          | Array (22)                                                   | POS                                  | AMB         | AMB     |          |     |
| collagen binding adhesion                                                                       | cbn                                                                                                                  | Array (22)                                                   | NEG                                  | NEG         | NEG     |          |     |
| cell wall associated fibronectinbinding protein                                                 | ebh (consensus)                                                                                                      | Array (22)                                                   | POS                                  | POS         | POS     |          |     |
| cell surface elastin binding protein                                                            | ebp5 (total)                                                                                                         | Array (22)                                                   | POS                                  | POS         | POS     |          |     |
|                                                                                                 | ebp5_probe 612                                                                                                       | Array (22)                                                   | POS                                  | POS         | POS     |          |     |
|                                                                                                 | ebp5_probe 614                                                                                                       | Array (22)                                                   | POS                                  | POS         | POS     |          |     |
|                                                                                                 | ebp5 (01-1111)                                                                                                       | Array (22)                                                   | NEG                                  | NEG         | NEG     |          |     |
|                                                                                                 | ebp5 (COL)                                                                                                           | Array (22)                                                   | NEG                                  | NEG         | NEG     |          |     |
| enolase                                                                                         | eno                                                                                                                  | Array (22)                                                   | POS                                  | POS         | POS     |          |     |
| fibrinogen binding protein (19 kDa)                                                             | fbp                                                                                                                  | Array (22)                                                   | POS                                  | POS         | POS     |          |     |
| fibronectinbinding protein A                                                                    | fnbA (total)                                                                                                         | Array (22)                                                   | POS                                  | NEG         | NEG     |          |     |
|                                                                                                 |                                                                                                                      | fnbA (MRSA252)                                               | Array (22)                           | POS         | POS     | POS      |     |
|                                                                                                 |                                                                                                                      | fnbA (consensus)                                             | Array (22)                           | POS         | POS     | POS      |     |
|                                                                                                 |                                                                                                                      | fnbA (COL)                                                   | Array (22)                           | NEG         | NEG     | NEG      |     |
|                                                                                                 |                                                                                                                      | fnbA (MRSA252)                                               | Array (22)                           | NEG         | NEG     | NEG      |     |
|                                                                                                 |                                                                                                                      | fnbA (Mu50+MW2)                                              | Array (22)                           | NEG         | NEG     | NEG      |     |
|                                                                                                 |                                                                                                                      | fnbA (RF122)                                                 | Array (22)                           | NEG         | NEG     | NEG      |     |
|                                                                                                 | fibronectinbinding protein B                                                                                         | fnbB (total)                                                 | Array (22)                           | POS         | POS     | POS      |     |
|                                                                                                 |                                                                                                                      |                                                              | fnbB (COL)                           | Array (22)  | NEG     | NEG      | NEG |
|                                                                                                 |                                                                                                                      |                                                              | fnbB (COL+Mu50+MW2)                  | Array (22)  | POS     | POS      | POS |
|                                                                                                 |                                                                                                                      | fnbB (Mu50)                                                  | Array (22)                           | NEG         | NEG     | NEG      |     |
|                                                                                                 |                                                                                                                      | fnbB (MW2)                                                   | Array (22)                           | NEG         | NEG     | NEG      |     |
|                                                                                                 |                                                                                                                      | fnbB (ST15)                                                  | Array (22)                           | NEG         | NEG     | NEG      |     |
|                                                                                                 |                                                                                                                      | fnbB (ST45-2)                                                | Array (22)                           | NEG         | NEG     | NEG      |     |
| Major histocompatibility complex class II analog protein (=Extracellular adhesion protein, esp) |                                                                                                                      | map (total)                                                  | Array (22)                           | POS         | POS     | POS      |     |
|                                                                                                 |                                                                                                                      |                                                              | map (COL)                            | Array (22)  | POS     | POS      | POS |
|                                                                                                 |                                                                                                                      |                                                              | map (MRSA252)                        | Array (22)  | NEG     | NEG      | NEG |
|                                                                                                 |                                                                                                                      | map (Mu50+MW2)                                               | Array (22)                           | POS         | POS     | POS      |     |
|                                                                                                 | Staphylococcus aureus surface protein G                                                                              | sspG (total)                                                 | Array (22)                           | NEG         | NEG     | NEG      |     |
|                                                                                                 |                                                                                                                      | sspG (COL+Mu50)                                              | Array (22)                           | NEG         | NEG     | NEG      |     |
|                                                                                                 |                                                                                                                      | sspG (MW2)                                                   | Array (22)                           | NEG         | NEG     | NEG      |     |
|                                                                                                 |                                                                                                                      | sspG (other than MRSA252+RF122)                              | Array (22)                           | NEG         | NEG     | NEG      |     |
|                                                                                                 | SerAsp rich fibrinogen/bone sialoprotein binding protein C                                                           | sbcC (total)                                                 | Array (22)                           | POS         | POS     | POS      |     |
|                                                                                                 |                                                                                                                      |                                                              | sbcC (consensus)                     | Array (22)  | POS     | POS      | POS |
|                                                                                                 |                                                                                                                      | sbcC (B1)                                                    | Array (22)                           | POS         | NEG     | NEG      |     |
|                                                                                                 |                                                                                                                      | sbcC (COL)                                                   | Array (22)                           | POS         | POS     | POS      |     |
|                                                                                                 |                                                                                                                      | sbcC (Mu50)                                                  | Array (22)                           | NEG         | NEG     | NEG      |     |
|                                                                                                 |                                                                                                                      | sbcC (MW2+MRSA252+RF122)                                     | Array (22)                           | NEG         | NEG     | NEG      |     |
|                                                                                                 |                                                                                                                      | sbcC (other than MRSA252+RF122)                              | Array (22)                           | NEG         | NEG     | NEG      |     |
| SerAsp rich fibrinogen/bone sialoprotein binding protein D                                      |                                                                                                                      | sbdD (total)                                                 | Array (22)                           | POS         | POS     | POS      |     |
|                                                                                                 |                                                                                                                      |                                                              | sbdD (consensus)                     | Array (22)  | POS     | POS      | POS |
|                                                                                                 |                                                                                                                      |                                                              | sbdD (COL+MW2)                       | Array (22)  | NEG     | NEG      | NEG |
|                                                                                                 |                                                                                                                      | sbdD (Mu50)                                                  | Array (22)                           | NEG         | AMB     | NEG      |     |
|                                                                                                 |                                                                                                                      | sbdD (other)                                                 | Array (22)                           | NEG         | NEG     | NEG      |     |
|                                                                                                 | van Willebrand factor binding protein                                                                                | vwb (total)                                                  | Array (22)                           | POS         | POS     | POS      |     |
|                                                                                                 |                                                                                                                      |                                                              | vwb (consensus)                      | Array (22)  | POS     | POS      | POS |
|                                                                                                 |                                                                                                                      |                                                              | vwb (COL+MW2)                        | Array (22)  | NEG     | NEG      | NEG |
|                                                                                                 |                                                                                                                      |                                                              | vwb (MRSA252)                        | Array (22)  | NEG     | NEG      | NEG |
|                                                                                                 |                                                                                                                      |                                                              | vwb (Mu50)                           | Array (22)  | NEG     | NEG      | NEG |
|                                                                                                 |                                                                                                                      | vwb (RF122)                                                  | Array (22)                           | NEG         | NEG     | NEG      |     |
|                                                                                                 |                                                                                                                      | vwb (RF122)                                                  | Array (22)                           | NEG         | NEG     | NEG      |     |
| TYPE I RESTRICTION-MODIFICATION SYSTEM                                                          |                                                                                                                      | type I site-specific deoxyribonuclease subunit, 1st locus    | hds2                                 | Array (22)  | NEG     | NEG      | NEG |
|                                                                                                 |                                                                                                                      | type I site-specific deoxyribonuclease subunit, 2nd locus    | hds2 (Mu50+H315+COL+USA300+NCTC8325) | Array (22)  | NEG     | NEG      | NEG |
|                                                                                                 |                                                                                                                      |                                                              | hds2 (MW2+MSSA476)                   | Array (22)  | NEG     | NEG      | NEG |
|                                                                                                 |                                                                                                                      | hds2 (RF122)                                                 | Array (22)                           | POS         | POS     | POS      |     |
|                                                                                                 |                                                                                                                      | hds2 (MRSA252)                                               | Array (22)                           | NEG         | NEG     | NEG      |     |
|                                                                                                 | type I site-specific deoxyribonuclease subunit, 3rd locus                                                            | hds3 (all other than RF122+ MRSA252)                         | Array (22)                           | NEG         | POS     | POS      |     |
|                                                                                                 |                                                                                                                      | hds3 (COL+USA300+NCTC8325+MW2+MSSA476+RF122)                 | Array (22)                           | POS         | POS     | POS      |     |
|                                                                                                 |                                                                                                                      | hds3 (Mu50+H315)                                             | Array (22)                           | NEG         | NEG     | NEG      |     |
|                                                                                                 |                                                                                                                      | hds3 (CC5+ MRSA252)                                          | Array (22)                           | NEG         | NEG     | NEG      |     |
|                                                                                                 |                                                                                                                      | hds3 (MRSA252)                                               | Array (22)                           | NEG         | NEG     | NEG      |     |
| type I site-specific deoxyribonuclease subunit, unknown locus                                   | hds5 (CC25)                                                                                                          | Array (22)                                                   | POS                                  | POS         | POS     |          |     |
|                                                                                                 | hds5 (CC15)                                                                                                          | Array (22)                                                   | POS                                  | AMB         | NEG     |          |     |
|                                                                                                 | hds5 (etd)                                                                                                           | Array (22)                                                   | POS                                  | POS         | POS     |          |     |
| HYALURONATE LYASE                                                                               | hyaluronate lyase, first / second locus                                                                              | hya1 (MRSA252)                                               | Array (22)                           | NEG         | NEG     | NEG      |     |
|                                                                                                 |                                                                                                                      | hya1 (MRSA252+RF122) and/or hya2 (consensus)                 | Array (22)                           | POS         | POS     | POS      |     |
|                                                                                                 |                                                                                                                      | hya1 (MRSA252+RF122) and/or hya2 (COL+USA300)                | Array (22)                           | NEG         | NEG     | NEG      |     |
|                                                                                                 | hyaluronate lyase, second locus                                                                                      | hya2 (all other than MRSA252)                                | Array (22)                           | NEG         | NEG     | NEG      |     |
|                                                                                                 |                                                                                                                      | hya2 (COL+USA300+NCTC8325)                                   | Array (22)                           | NEG         | NEG     | NEG      |     |
|                                                                                                 |                                                                                                                      | hya2 (all other than COL+USA300+NCTC8325)                    | Array (22)                           | POS         | POS     | POS      |     |
|                                                                                                 |                                                                                                                      | hya2 (all other than COL+USA300+NCTC8325)                    | Array (22)                           | POS         | POS     | POS      |     |
|                                                                                                 |                                                                                                                      | hya2 (MRSA252)                                               | Array (22)                           | NEG         | NEG     | NEG      |     |
|                                                                                                 | MISCELLANEOUS GENES                                                                                                  | hypothetical protein, located next to serine protease operon | Q2FK0                                | Array (22)  | NEG     | NEG      | NEG |
|                                                                                                 |                                                                                                                      | uriospecific efflux/transporter                              | Q2V18B                               | Array (22)  | NEG     | AMB      | NEG |
| hypothetical protein                                                                            |                                                                                                                      | Q2V40Z                                                       | Array (22)                           | NEG         | NEG     | NEG      |     |
| immunodominant antigen B                                                                        |                                                                                                                      | isaB                                                         | Array (22)                           | POS         | POS     | POS      |     |
|                                                                                                 |                                                                                                                      | isaB (MRSA252)                                               | Array (22)                           | POS         | AMB     | AMB      |     |
| defensin resistance protein                                                                     |                                                                                                                      | mpfF (COL+MW2)                                               | Array (22)                           | POS         | AMB     | POS      |     |
|                                                                                                 |                                                                                                                      | mpfF (Mu50+MRSA252)                                          | Array (22)                           | POS         | AMB     | POS      |     |
| transferrin-binding protein                                                                     |                                                                                                                      | isaA (consensus)                                             | Array (22)                           | POS         | POS     | POS      |     |
|                                                                                                 |                                                                                                                      | isaA (MRSA252)                                               | Array (22)                           | POS         | NEG     | NEG      |     |
|                                                                                                 |                                                                                                                      | isaA (other than MRSA252)                                    | Array (22)                           | POS         | AMB     | POS      |     |
| hypothetical protein, similar to integral membrane protein LmrP                                 | lmpP (other than RF122)                                                                                              | Array (22)                                                   | POS                                  | NEG         | NEG     |          |     |
|                                                                                                 | lmpP (RF122)                                                                                                         | Array (22)                                                   | POS                                  | POS         | POS     |          |     |
